# Supplementary material
Source: Springer Nature journal article supplement (https://www.springermedizin.de/resource/supplementary/13032_2014_87_MOESM1_ESM.pdf/9651598)

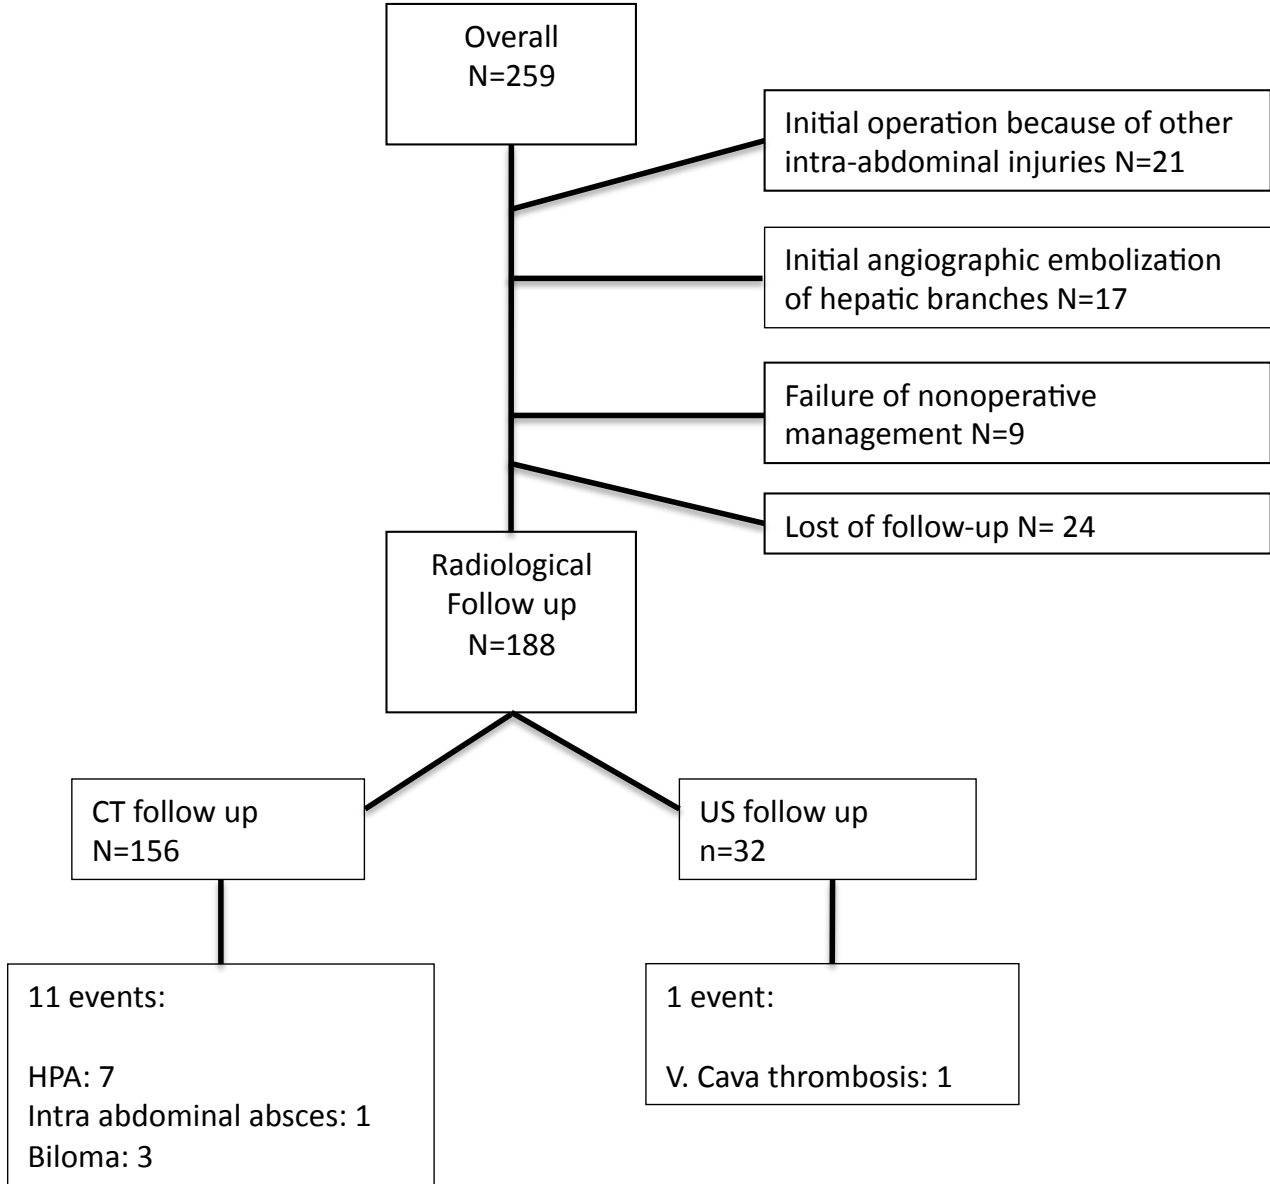

Supplement: MOESM1 [file 9651598]
